Riparian vegetation limits oxidation of thermodynamically unfavorable bound-carbon stocks  
along an aquatic interface

Emily B. Graham<sup>1</sup>, Malak Tfaily<sup>2</sup>, Alex R. Crump<sup>1</sup>, Amy E. Goldman<sup>1</sup>, Evan Arntzen<sup>1</sup>, Elvira Romero<sup>1</sup>, C. Tom Resch<sup>1</sup>, David W. Kennedy<sup>1</sup>, and James C. Stegen<sup>1</sup>

<sup>1</sup>Pacific Northwest National Laboratory, Richland, WA USA

<sup>2</sup>Environmental Molecular Science Laboratory, Richland, WA USA

**Correspondence:** Emily B. Graham, Pacific Northwest National Laboratory, PO Box 999,  
Richland, WA 99352, 509-372-6049, emily.graham@pnnl.gov

**Keywords:** terrestrial, priming, recalcitrant, labile, FT-ICR, Hanford, KEGG, respiration

1           **In light of increasing terrestrial carbon (C) transport across aquatic boundaries, the**  
2 **mechanisms governing organic carbon (OC) oxidation along terrestrial-aquatic interfaces**  
3 **are crucial to future climate predictions. Here, we investigate biochemistry, metabolic**  
4 **pathways, and thermodynamics corresponding to OC oxidation in the Columbia River**  
5 **corridor. We leverage natural vegetative differences to encompass variation in terrestrial C**  
6 **inputs. Our results suggest that decreases in terrestrial C deposition associated with**  
7 **diminished riparian vegetation induce oxidation of physically-bound (i.e., mineral and**  
8 **microbial) OC at terrestrial-aquatic interfaces. We also find that contrasting metabolic**  
9 **pathways oxidize OC in the presence and absence of vegetation and—in direct conflict with**  
10 **the concept of ‘priming’—that inputs of water-soluble and thermodynamically-favorable**  
11 **terrestrial OC protects bound-OC from oxidation. Based on our results, we propose a**  
12 **mechanistic conceptualization of OC oxidation along terrestrial-aquatic interfaces that can**  
13 **be used to model heterogeneous patterns of OC loss under changing land cover**  
14 **distributions.**  
15

16           Soils and nearshore sediments comprise a C reservoir that is 3.2 times larger than the  
17 atmospheric C pool<sup>1</sup>, yet Earth System Models (ESMs) struggle to integrate mechanisms of OC  
18 oxidation into predictions of atmospheric carbon dioxide concentrations<sup>2-4</sup>. In particular, OC  
19 oxidation in nearshore habitats constitutes a significant uncertainty in atmospheric C flux<sup>5,6</sup> and  
20 knowledge on C cycling along these transition ecosystems is necessary to accurately predict  
21 global C cycling<sup>1</sup>. Terrestrial C inputs into aquatic systems have nearly doubled since pre-  
22 industrial times; an estimated 2.9 Pg C now crosses terrestrial-aquatic interfaces annually (vs. 0.9  
23 Pg C yr<sup>-1</sup> stored within forested ecosystems)<sup>7,8</sup>. The magnitude of this flux has garnered  
24 significant recent attention<sup>5,7,8</sup>, yet the biochemical, metabolic, and thermodynamic mechanisms  
25 governing OC oxidation along aquatic interfaces remain a crucial uncertainty in climate  
26 predictions. New molecular techniques are providing insight into OC dynamics<sup>9-11</sup>, but we still  
27 lack an understanding of why some OC remains stabilized for millennia whereas other OC is  
28 rapidly oxidized<sup>12</sup>.

29           The ability of microorganisms to oxidize complex OC is an important constraint on C  
30 cycling, as OC is a mixture of compounds with different propensities for biotic oxidation<sup>13,14</sup>.  
31 Within terrestrial research, OC oxidation is often framed within the concept of ‘priming’,  
32 whereby microbial oxidation of chemically-complex and thermodynamically unfavorable OC is  
33 fueled by the addition of more bioavailable OC compounds<sup>15</sup>. However, the applicability of  
34 priming in aquatic environments is unclear<sup>16-18</sup>. Aquatic systems, and in particular nearshore  
35 environments, frequently experience mixing of terrestrial and aquatic C sources with distinct  
36 chemical character, providing a theoretical basis for priming expectations<sup>16,17</sup>. Consistent with  
37 priming, Guenet et al.<sup>16</sup> have proposed that this mixing generates “hotspots” or “hot moments” of  
38 biological activity facilitated by complementary C resources. Alternatively, OC stabilization in

39 sediments is tightly linked to organomineral interactions, which provide physical protection from  
40 extracellular enzyme activity<sup>19-21</sup>, and the strength of these interactions may override any  
41 evidence for priming. Early investigations of priming effects in aquatic systems have been  
42 inconclusive, with evidence both for<sup>22</sup> and against<sup>17,23</sup> priming mechanisms.

43 Several new perspectives have attempted to move beyond frameworks such as priming  
44 that depend on strict chemical definitions to predict OC oxidation<sup>1,24,25</sup>. Two recent perspectives  
45 propose that the probability of OC oxidation is related to a spectrum of chemical properties and  
46 that even very complex OC can be oxidized when more favorable OC is depleted or isolated  
47 from microorganisms. Lehmann and Kleber<sup>25</sup> have proposed a ‘soil continuum hypothesis’  
48 whereby OC is a gradient of continually decomposing compounds that are variably accessible  
49 for biotic oxidation, with no notion of chemically labile versus recalcitrant compounds.  
50 Similarly, Burd et al.<sup>1</sup> have suggested that OC oxidation is a ‘logistical problem’ involving the  
51 ability of microorganisms to access and metabolize compounds. Both concepts capture the  
52 emerging belief that chemically-complex, thermodynamically unfavorable OC can be oxidized  
53 when more favorable compounds are inaccessible.

54 Here, we address a critical knowledge gap in predicting the global C balance<sup>1,5,6,8</sup> —  
55 mechanisms governing OC oxidation along terrestrial-aquatic interfaces. Specifically, we  
56 investigate the biochemistry, microbial metabolism, and thermodynamics of OC oxidation in  
57 nearshore water-soluble and physically-bound (i.e., mineral and microbial) OC pools. We  
58 leverage natural variation in riparian vegetation along the Columbia River in Eastern Washington  
59 State (approximately 46° 22’ 15.80”N, 119° 81’ 16’ 31.52”W), the largest river in the U.S. west  
60 of the Continental Divide<sup>26,27</sup>, to examine these mechanisms in the context of spatial variation in  
61 terrestrial C deposition. Vertical profiles were collected at three positions along each of two

62 transects—within patches of shoreline with or without riparian vegetation (hereafter, R and NR  
63 for ‘riparian’ and ‘non-riparian’, Table 1)—that ran perpendicular to river flow. Consistent with  
64 the priming paradigm and the presence of complementary resources in nearshore environments  
65 with terrestrial vegetation, we hypothesize that (a) C deposition associated with riparian  
66 vegetation increases total aerobic metabolism and enhances oxidation of bound-OC stocks, while  
67 (b) areas without riparian vegetation foster lower rates of aerobic metabolism with minimal  
68 oxidation of bound-OC.

69

## 70 **Results.**

71 *Shifts in physicochemical, metabolic, and C character between vegetation states.*

72 Differences in vegetation states (i.e., vegetated vs. unvegetated areas) between the  
73 transects corresponded to differences in physicochemistry, aerobic metabolism, and OC pool  
74 composition. R was characterized by mature trees (*Morus rubra* (Red Mulberry) and *Ulmus*  
75 *rubra* (Slippery Elm) with a closed canopy) near the water line and was nutrient-rich as  
76 compared to NR (Supplementary Fig. 1-3). R displayed comparatively high concentrations of  
77 total C and rates of aerobic metabolism (Supplementary Fig. 1-3). In contrast, NR consisted of  
78 vegetation-free, cobble-ridden shoreline with sandier soils, low total C, and low aerobic  
79 metabolism (Supplementary Fig. 1-3).

80 The composition of OC pools was also distinct at each vegetation state (Fig. 1). We  
81 evaluated OC composition by sequential water- (H<sub>2</sub>O), methanol (-MeOH), and chloroform-  
82 (CHCl<sub>3</sub>) extractions<sup>10,11</sup>, followed by analysis via Fourier transform ion cyclotron resonance  
83 mass spectrometry (FT-ICR-MS). Previous work has shown that each solvent is selective  
84 towards the type of compounds it extracts<sup>10</sup>. Because MeOH has a polarity in between that of

85 water and CHCl<sub>3</sub>, it extracts both water-soluble and bound-OC pools (i.e., a mix of compounds  
86 that water and CHCl<sub>3</sub> extract). In this study we are interested in the differences in OC  
87 composition between pure water-soluble and bound-OC pools only, and we will focus our  
88 discussion on H<sub>2</sub>O- and CHCl<sub>3</sub>-extractions only. Water is a polar solvent with a selection bias for  
89 carbohydrates with high O/C ratios, amino-sugars and other labile polar compounds<sup>10</sup>; and, as  
90 nearshore environments frequently experience wetting, water extractions represents an  
91 estimation of physically accessible OC compounds in these environments. Conversely, CHCl<sub>3</sub> is  
92 selective for non-polar lipids associated with mineral interactions and cellular membranes<sup>10</sup>. We  
93 use H<sub>2</sub>O- and CHCl<sub>3</sub>-extracted OC as proxies for readily bioavailable (i.e., weakly bound  
94 physically) vs. less bioavailable (i.e., mineral-bound and microbial) pools, respectively.

95         Compositional difference in OC pools indicated a possibility for fundamentally different  
96 OC oxidation processes at each vegetation state, whereby preferential oxidation of certain  
97 compounds was either driven by or generates an observable difference in OC pool composition.  
98 Further, total organic OC content explained only 38% of aerobic metabolism rates ( $R^2 = 0.38$ ,  $P$   
99  $< 0.0001$ , Supplementary Fig. 4), leaving open the possibility that OC compositional differences  
100 may be related to differences in aerobic metabolism at each vegetation state.

101

102 *Associations between C transformations and aerobic metabolism.*

103         Given chemical differences across vegetation states in each OC pool and known impacts  
104 of C chemistry on metabolic functioning in other systems<sup>28,29</sup>, we postulated that compound-  
105 specific transformations may be related to rates of aerobic metabolism at each of our vegetation  
106 states. To reveal transformations associated with aerobic metabolism—and to study differences  
107 in those transformations across vegetation states—we estimated the number of times a given

108 transformation occurred within each OC pool, within each sample. In turn, these ‘abundance’  
109 estimates were correlated to rates of metabolism (resazurin assay, see Methods). Transformations  
110 were identified as mass differences in known biochemical pathways between peaks detected by  
111 FT-ICR-MS (i.e., the mass gained or lost in reactions, see Methods, Fig. 2). Positive  
112 relationships were inferred as processes possibly associated with biotic OC oxidation. We refer  
113 to H<sub>2</sub>O- and CHCl<sub>3</sub>-soluble OC pools at R and NR, respectively, as RW (‘riparian water’), RC  
114 (‘riparian chloroform’), NRW (‘non-riparian water’), and NRC (‘non-riparian chloroform’) for  
115 the remainder of the manuscript.

116 Transformation analysis indicated that the biochemical processes associated with OC  
117 oxidation are significantly different across riparian vegetation conditions. Specifically, the  
118 identities of OC transformations that increased in abundance with increases in aerobic  
119 metabolism at each vegetation state were significantly different (PERMANOVA, H<sub>2</sub>O P = 0.022  
120 and CHCl<sub>3</sub> P = 0.002, Fig. 3 a-b, Table 2). In comparing differences in transformations occurring  
121 with the water-soluble OC pool, we observed a dominance of amino- and sugar-associated  
122 transformations at RW vs. NRW. Twenty-six transformations were identified as contributing to  
123 aerobic metabolism in RW, while none were identified in NRW. These RW transformations  
124 were primarily associated with glucose, alanine, and lysine (Table 2). Conversely, within the  
125 bound-OC pool, 38 transformations were identified as contributing to aerobic metabolism in  
126 NRC, compared to only 11 in RC. In both cases, these transformations consisted of complex C  
127 molecules such as pyridoxal phosphate, palmitic acid, and glyoxylate (Table 2).

128 The larger number of transformations associated with aerobic metabolism in NR vs.  
129 NRW, and the larger number in NRC vs. NW, suggests that aerobic metabolism in vegetated and  
130 unvegetated areas depend on water-soluble and bound-OC pools, respectively. We note some

131 oxidation of the bound-OC pool under vegetated conditions, but only 11 correlations were  
132 observed between RC transformations and aerobic metabolism suggesting a relatively minor  
133 role, especially considering that there were 38 significant correlations for NRC. This evidence  
134 suggests that an increased supply of bioavailable compounds in vegetated areas leads to bound-  
135 OC being less involved in aerobic metabolism, relative to unvegetated areas where bound-OC  
136 appears to be heavily involved in aerobic metabolism. The concept of priming<sup>15</sup> would predict  
137 the opposite pattern—a greater supply of bioavailable OC should increase the contributions of  
138 less bioavailable OC (here, bound-OC) to aerobic metabolism. Our results run counter to a  
139 priming mechanism and indicate that the supply of bioavailable compounds—associated with  
140 riparian vegetation—diminishes the contribution of bound-OC to aerobic metabolism and, in  
141 turn, protects bound-OC pools. Mineral-stabilized OC therefore has greater potential to remain  
142 sequestered along river corridors with spatially and temporally consistent inputs of bioavailable  
143 OC, potentially derived from riparian vegetation. The fate of OC that moves across the  
144 terrestrial-aquatic continuum in may be impacted by land use change<sup>30</sup> in ways not currently  
145 represented in ESMs.

146

147 *Associations between microbial metabolic pathways and aerobic metabolism.*

148       Across vegetation conditions we observed stark differences in the identity of C  
149 transformations that correlated with aerobic metabolic rate. In turn, we hypothesized that the  
150 microbial metabolic pathways associated with OC transformations were also dependent on  
151 vegetation condition. To address this hypothesis, we first identified the FT-ICR-MS peaks  
152 involved in the molecular transformations that were correlated with metabolic rate; each instance  
153 of each transformation involves two peaks (a reactant and a product). These peaks were mapped



154 to microbial metabolic pathways represented in Kyoto Encyclopedia of Genes and Genomes  
155 (KEGG, see Methods, Fig. 2)<sup>31</sup>. Like the previous section, we correlated the abundance of these  
156 pathways within each sample to aerobic metabolism and inferred positive correlations as  
157 microbial metabolic pathways contributing to OC oxidation. Results were visualized with a  
158 hierarchical clustering heat map based on relative abundance of each pathway contributing to OC  
159 oxidation (See Methods, Fig 4).

160 Pathways associated with OC oxidation were distinct at R vs. NR, further supporting our  
161 hypothesis that there were fundamental differences in the metabolic processing of OC in the  
162 presence or absence of riparian vegetation. Specifically, while the metabolism of plant-derived  
163 compounds appeared to be a major driver of aerobic respiration at both vegetation states,  
164 metabolism at R mostly involved the readily bioavailable plant derivatives in the H<sub>2</sub>O-soluble  
165 OC pool, and metabolism at NR was associated with plant derivatives in the CHCl<sub>3</sub>-soluble pool  
166 (Fig. 4).

167 In RW, two primary pathways were involved in metabolism of plant compounds, each  
168 contained within its own hierarchical cluster (map01110: Biosynthesis of secondary metabolites;  
169 map00941: Flavonoid biosynthesis). A concomitant cluster of plant-associated metabolisms in  
170 RW (Cluster 4) was also positively correlated to aerobic metabolism (Fig. 4). Secondary  
171 metabolites (map01110) are largely comprised of plant-derived compounds such as flavonoids<sup>32</sup>,  
172 terpenoids<sup>33</sup>, and nitrogen-containing alkaloids<sup>34</sup>, while flavonoids<sup>32</sup> are one of those most  
173 abundant plant-derived compounds. Associations with aflatoxin<sup>35</sup>, flavone/flavonol<sup>32</sup>, and  
174 phenylpropanoids<sup>36</sup> (Cluster 4) bolster this association between plant-associated metabolic  
175 pathways and aerobic metabolism in RW. Although correlations between plant-based KEGG  
176 pathways and aerobic metabolism could indicate the persistence of plant secondary metabolites

177 rather than microbial metabolism, our results indicate a central role for vegetation in water-  
178 soluble OC oxidation in either case. For example, if KEGG associations were attributable to  
179 plant metabolism instead of microbial metabolism, correlations between plant-associated KEGGs  
180 and aerobic metabolism in RW would indicate an indirect relationship between plant growth and  
181 microbial oxidation of OC, whereby plant byproducts support microbial communities in  
182 oxidizing other portions of the OC pool.

183 In contrast to RW, NRW did not display associations between plant-associated metabolic  
184 pathways and OC oxidation. All correlations indicated broad metabolic processes including  
185 membrane transport and carbohydrate metabolism that may indicate utilization of other resources  
186 (Cluster 3, Fig. 4).

187 Instead, we observed relationships between plant-associated metabolisms and OC  
188 oxidation within NRC. For example, correlations were strongest in Cluster 1, which contained  
189 pathways of cutin, suberine, and wax biosynthesis<sup>37-39</sup>, alpha-linolenic acid metabolism<sup>40,41</sup>, and  
190 biosynthesis of secondary metabolites<sup>32-34</sup> (Fig. 4). Each of these pathways denotes the synthesis  
191 or metabolism of a plant-associated lipid compound. Because no specific metabolisms were  
192 correlated to OC oxidation in the H<sub>2</sub>O-soluble pool, we hypothesize that these lipid-based  
193 metabolisms comprise the primary KEGG-identifiable pathways associated with OC oxidation in  
194 areas without riparian vegetation. We also observed one cluster of pathways that correlated with  
195 metabolism at RC (Cluster 7) and contained plant-associated metabolic pathways such as linoleic  
196 acid metabolism<sup>40,41</sup> and brassinosteroid biosynthesis<sup>42</sup>, indicating some oxidation of lipid plant  
197 material in the bound-OC pool under vegetated conditions. We therefore propose that plant-  
198 derived lipid compounds serve as a secondary substrate for OC oxidation in shorelines with  
199 riparian vegetation, given that most correlations at R were detected in the water-soluble pool.

200

201 *Thermodynamics of carbon oxidation.*

202       Finally, we hypothesized that microbes would preferentially oxidize more  
203 thermodynamically-favorable compounds at both sites, consistent with universal thermodynamic  
204 constraints on biogeochemical cycles<sup>43-45</sup>. Because we observed evidence for preferential OC  
205 oxidation in the water-soluble OC pool at R and in the bound-OC pool at NR, we further  
206 predicted that these constraints would be limited to oxidation of preferred substrate pools within  
207 each vegetation state. We determined Gibbs Free Energy of C oxidation ( $\Delta G_{\text{Cox}}$ ) of each OC  
208 pool via the stoichiometry of major elements in C compounds as per La Rowe and Van  
209 Cappellen<sup>46</sup>.  $\Delta G_{\text{Cox}}$  is generally positive, indicating that C oxidation must be coupled to the  
210 reduction of a terminal electron acceptor for a thermodynamically favorable reaction, and higher  
211  $\Delta G_{\text{Cox}}$  denotes a less thermodynamically favorable compound, assuming consistency in the  
212 terminal electron acceptor. Then, we correlated rates of aerobic metabolism to  $\Delta G_{\text{Cox}}$  in RW, RC,  
213 NRW, and NRC to reveal how thermodynamic favorability varied with the oxidation of each OC  
214 pool.

215       Aerobic metabolism positively correlated to  $\Delta G_{\text{Cox}}$  in RW ( $R^2 = 0.22$ ,  $P = 0.03$ , Fig 5a)  
216 and NRC ( $R^2 = 0.54$ ,  $P = 0.001$  Fig 5b) but did not correlate in RC or NRW. In both cases,  
217 aerobic metabolism corresponded to a depletion of more thermodynamically-favorable OC (i.e.,  
218 OC became less favorable as aerobic metabolism increased), resulting in progressively  
219 unfavorable thermodynamic conditions.

220       The priming conceptual framework would predict that terrestrial inputs associated with  
221 riparian vegetation should condition microbial communities to oxidize less thermodynamically-  
222 favorable C, such as that found in the bound-OC pool. In such a scenario, inputs of

223 thermodynamically-favorable carbon should—by minimizing community-level energy  
224 constraints—allow for the rise of microbial physiologies that can oxidize less favorable C<sup>15</sup>. In  
225 this case, a significant relationship between thermodynamic favorability and aerobic metabolism  
226 in the RW pool should lead to a relationship within the RC pool. Our results reveal a strong  
227 relationship within the RW pool, but not in the RC pool, thereby rejecting an influence of  
228 priming. Instead, our results suggest that bound-OC pools are protected by thermodynamically-  
229 favorable compounds that serve as preferred substrate.

230

## 231 **Discussion.**

232 In contrast to our expectation that water-soluble OC associated with riparian vegetation  
233 would increase oxidation of bound-OC pools, we observed evidence consistent with inhibition of  
234 bound-OC oxidation by thermodynamically favorable water-soluble compounds. Priming has  
235 been actively debated in aquatic research<sup>16-18</sup>, and a number of other studies have been unable to  
236 detect a priming effect in both sediment and aqueous habitats<sup>17,23</sup>. The mechanisms resulting in  
237 priming are not well understood, but the phenomenon has been associated with nutrient and  
238 energy limitations in soil environments<sup>15</sup>. For instance, under nutrient limitation, microorganisms  
239 may oxidize chemically-complex OC to garner resources (e.g., nitrogen mining), while shared  
240 resources that facilitate OC oxidation (e.g., extracellular enzymes) are more likely to facilitate  
241 ecological cheating under energy limiting conditions<sup>15,16,23,47</sup>. Our system is oligotrophic,  
242 containing a fraction of the total C content observed in other systems (Supplementary Fig. 1),  
243 and therefore, C limitation rather than nutrient limitation might drive OC oxidation dynamics. In  
244 such a case, readily bioavailable C inputs would be rapidly oxidized but microbial communities

245 may be well-adapted to rely on alternative energy sources (e.g.,  $\text{NH}_4^+$ , Fe) that may be more  
246 available than bound-OC pools.

247

248 *Conceptual model for OC oxidation at terrestrial-aquatic interfaces.*

249         Based on our work, we propose a conceptual model of OC oxidation along terrestrial-  
250 aquatic interfaces in which the oxidation of bound-OC is limited by terrestrial inputs from  
251 riparian vegetation (Fig 6. a-b). Riparian vegetation sustains inputs of water-soluble compounds  
252 to nearshore OC pools, resulting in a larger thermodynamically-favorable and water-soluble OC  
253 pool (Fig. 6b). This leads to higher overall C content in nearshore sediments and elevated rates of  
254 aerobic respiration relative to low vegetation areas. However, microbial activity primarily  
255 operates on the water-soluble OC pool with minimal oxidation of bound-OC due to physical  
256 and/or thermodynamic protection of this pool. For instance,  $\Delta G_{\text{Cox}}$  was higher in water-soluble  
257 OC pools than in bound-OC, and a large presence of this thermodynamically-favorable pool may  
258 provide adequate substrate to sustain metabolic functioning, limiting the need to metabolize less  
259 thermodynamically-favorable OC. Additionally, organomineral interactions physically protect  
260 OC from extracellular enzyme activity<sup>19</sup> and may require different enzymes than water-soluble  
261 OC, inhibiting the bioavailability of thermodynamically-favorable OC by sequestering it within  
262 larger aggregates.

263         In contrast, non-vegetated riparian zones provide little input into water-soluble OC pools  
264 (Fig 6a), and rates of metabolism and C pool sizes are lower in these environments. Carbon  
265 oxidation in these non-vegetated zones occurs primarily within the bound-OC pool, albeit more  
266 slowly and as product of different biochemical and metabolic pathways than in vegetated  
267 environments (e.g., complex C transformations and lipid-based metabolism of plant derivatives).

268 We posit that water-soluble pools in non-vegetated sediments are sufficiently small that investing  
269 in enzymes needed to metabolize this OC pool results in a net loss on energy investment. Instead,  
270 microbes in unvegetated areas must investment in cellular machinery to access bound-OC, and  
271 our results imply that the cellular machinery needed to access bound-OC is distinct from the  
272 machinery needed to access water-soluble OC.

273 Interestingly, aerobic metabolism within both types of sediments is related to a depletion  
274 of thermodynamically favorable compounds; however, this dynamic is associated with water-  
275 soluble OC pools in vegetated zones vs. bound-OC pools in non-vegetated zones. That is,  
276 microorganisms in both environments are constrained to the metabolism of their primary  
277 substrate pool but preferentially digest more energetically favorable compounds within that pool.  
278 This dynamic seems to suggest that microorganisms are conditioned to metabolize a subset of  
279 compounds within sediment OC, possibly defined by thermodynamic or physical protection  
280 mechanisms, but operate under universal thermodynamic constraints once adapted to oxidize a  
281 certain OC pool.

282

### 283 *Broader Implications.*

284 Our results indicate that terrestrial C inputs associated with riparian vegetation protect  
285 bound-OC from oxidation, possibly aiding long-term storage of mineral-bound pools along river  
286 corridors, and our work is particularly relevant to global patterns of CO<sub>2</sub> emissions in light of  
287 changes in land cover and increases in terrestrial-aquatic C fluxes. The magnitude, distribution,  
288 and chemical quality of terrestrial C fluxes into aquatic environments are perturbed by shifts in  
289 land cover (e.g., due to agriculture, urbanization, and climate-driven vegetation change)<sup>48,49</sup>.  
290 These fluxes have been examined primarily for their own propensity to be oxidized along land-

291 to-sea continuums<sup>5,7,8</sup>, but we also suggest a role for these fluxes in stabilizing mineral-bound  
292 carbon within nearshore environments. For example, vegetation removal, impervious surfaces,  
293 and drainage systems coincident with urbanization alter terrestrial C runoff patterns, both  
294 increasing their magnitude and creating preferential deposition flowpaths<sup>50-52</sup>. Agricultural  
295 drainage systems also lead to preferential flowpaths as well as spatiotemporal variation in the  
296 quantity and quality of terrestrial-aquatic fluxes<sup>53,54</sup>, an effect that strongly influences C cycling  
297 given that 40% of the earth's land is cultivated<sup>30,53</sup>. We propose that changes in the distribution  
298 of these fluxes through space and time may impact OC oxidation both in the C transported along  
299 these flow paths and within sediments that are differentially exposed to terrestrial OC.

300 Finally, vegetation distributions in natural ecosystems are predicted to shift in response to  
301 altered precipitation regimes. Associated changes in plant phenology, morphology, and  
302 establishment will impact the quantity, quality, and distribution of terrestrial material entering  
303 aquatic systems<sup>49</sup>, and we currently have an incomplete understanding of how these patterns will  
304 vary across ecosystems and precipitation patterns<sup>48,49</sup>. A mechanistic framework for C oxidation  
305 along vegetative heterogeneity in river corridors will therefore aid in predicting how terrestrial-  
306 aquatic interfaces respond under proposed scenarios. Here, we demonstrate a potential for  
307 increases in the intensity of terrestrial C fluxes to lead to larger mineral-bound C pools by  
308 physically and thermodynamically protecting these pools; and conversely, a potential for  
309 oxidation of mineral-bound C pools in areas with diminished terrestrial C inputs.

310

311 *Conclusions.*

312 Earth System Models depend on mathematical representations of C cycling, and the  
313 continued development of these models is tightly coupled to conceptual advances drawn from

314 field-based observations<sup>1,55</sup>. Despite recent progress, these models are still missing key  
315 regulatory processes<sup>2-4</sup>. To address this knowledge gap, we propose a new model of OC  
316 dynamics based on analysis of *in situ* observational data that explicitly considers a central  
317 challenge in model improvement—biochemical, metabolic, and thermodynamic mechanisms  
318 governing OC oxidation along terrestrial-aquatic interfaces. Our results directly contrast those  
319 expected within a ‘priming’ framework, and we advance that water-soluble thermodynamically-  
320 favorable OC associated with riparian vegetation protects thermodynamically-unfavorable  
321 bound-OC from oxidation. We also demonstrate differences in biochemical and metabolic  
322 pathways associated with metabolism of water-soluble and bound-OC pools in the presence or  
323 absence of riparian vegetation, furthering a processed-based understanding of terrestrial-aquatic  
324 interfaces.

325         Our conceptualization of OC oxidation may also be applicable beyond terrestrial-aquatic  
326 interfaces, as many ecosystems experience spatiotemporal variability in the quantity of  
327 thermodynamically-favorable water-soluble OC. For instance, vegetation senescence generates  
328 pulses of bioavailable C into most temperate and tropical ecosystems. Our research provides an  
329 opportunity to enhance the mechanistic underpinning of OC oxidation process representations  
330 within ESMs—an imperative under heterogeneous landscapes and unknown future land cover  
331 distributions—and proposes interactions between OC thermodynamics and mineral-inhibition of  
332 OC oxidation as a key future research need.

333

## 334 **Methods.**

335 *Site Description.*



336 This study was conducted along the Columbia River shoreline within the Hanford 300A  
337 (approximately 46° 22' 15.80"N, 119° 16' 31.52"W) in eastern Washington State<sup>56-58</sup>. The  
338 Columbia River experiences shoreline geographic variation in vegetation patterns, substrate  
339 geochemistry, and microbiome composition<sup>56,57,59-63</sup>. Accordingly, the Hanford Reach of the  
340 Columbia River embodies a dynamic natural system in which to examine heterogeneity of  
341 terrestrial OC inputs and subsequent OC cycle mechanisms.

342 Liquid N<sub>2</sub>-frozen sediment profiles (0-60 cm) were collected at two transects  
343 perpendicular to the Columbia River in March 2015, separated by a distance of ~170m. The  
344 southern transect (R) was characterized by a moderately sloping scour zone, small boulders; and  
345 vegetation consisted of woody perennials *Morus rubra* (Red Mulberry) and *Ulmus rubra*  
346 (Slippery Elm), with a closed canopy. Upper elevation samples were collected within the root  
347 zone. In contrast, the northern transect (R) was characterized by a gradually sloping scour zone  
348 and cobbled armor layer. Although a Red Mulberry was located nearby, the upper elevation  
349 samples were outside the root zone. We collected profiles at three locations in each transect with  
350 5m spacing. The samples were collected as *in situ* liquid-N<sub>2</sub> frozen sediment profiles within a  
351 spatial domain of ~175 x 10m. In each transect, the first vertical profile (elevation 1) was located  
352 at ~0.5m (vertical distance) below the water line and the last vertical profile (elevation 3) was  
353 located ~0.5m (vertical distance) above the water line approximately 10m horizontal distance,  
354 with elevation 2 situated at the midpoint.

355

### 356 *Sample Collection.*

357 Liquid N<sub>2</sub>-frozen sediment profiles were collected as outlined in Moser et al<sup>27</sup> using a  
358 method developed by Lotspeich and Reed<sup>64</sup> and modified by Rood and Church<sup>65</sup>. A pointed

359 stainless steel tube (152 cm length, 3.3 cm outside diameter, 2.4 cm inside diameter) was driven  
360 into the river bed to a depth of ~60cm. N<sub>2</sub>(l) was poured down the tube for ~15 minutes, until a  
361 sufficient quantity of material had frozen to the outside of the rod. The rod and attached material  
362 was removed from the river bed with a chain hoist suspended beneath a tripod. Profiles were  
363 placed over an aluminum foil lined cooler containing dry ice. Frozen material was removed by  
364 with a mallet and sectioned into 10cm depth intervals from 0-60 cm (n = 6 per profile, except for  
365 N3 which was sectioned only from 30-60cm; total n = 33). The material was then wrapped in the  
366 foil and transported on dry ice to permanent storage at -80°C.

367

#### 368 *Particle Size Distribution.*

369 Samples were dried for 4-5 days at 105°C, weighed, then transferred to 4L  
370 polypropylene Nalgene bottles and vigorously agitated to break up aggregates. Material was then  
371 sieved into 1- phi size classes from 64mm (-6 phi) to <.062mm (5 phi) and weighed to determine  
372 the weight percentage for each fraction. Each subsample was placed in a 50ml Corning tube with  
373 25ml of 1% pyrophosphate solution and placed on a rotary shaker overnight. This mixture was  
374 then poured and washed through a #230 sieve (.062mm). Material retained on the sieve was  
375 dried overnight and weighed to determine the weight percentage of the sand fraction, which was  
376 then subtracted from the initial 10g to determine the silt and clay fraction. These measurements  
377 are then averaged and the weight-by-size fractions of the original 10g were determined. We used  
378 the Modified Wentworth Scale to define the mud fraction as <.062mm (#230 sieve), the sand  
379 fraction as <2mm to .062 (passes #10 sieve, but retained on a #230), and the gravel fraction as  
380 >2mm (retained on #10 sieve) to 64mm.

381

382 *Sample Processing.*

383           Samples were transferred to an anaerobic glovebag with 95% N<sub>2</sub> and 5% H<sub>2</sub> (Coy  
384 Laboratory Products, Grass Lake, MI) and thawed on clean 2mm stainless steel sieves prior to  
385 processing. Samples were sieved and homogenized; and 20g was subsampled into a pre-weighed,  
386 pre-cleaned 40ml glass vial for Fe(II) analysis. The remaining <2mm sieved and >2mm bulk  
387 samples were removed from the glovebag. Subsamples were collected from the <2mm fraction  
388 for further analysis. Approximately 5g was transferred into a 40-mL borosilicate glass vial and  
389 stored at -80°C for analysis of OC chemistry (see below). An additional sample was taken for  
390 elemental analysis (OC, N) and remaining material was divided into 20g samples collected into  
391 40-mL borosilicate glass vials and stored at -80°C.

392

393 *Analytical methods.*

394           We analyzed sample geochemistry with the following approaches. Total carbon (OC),  
395 nitrogen (N), and sulfur (S) were measured using an Elementar vario EL cube (Elementar  
396 Co.Germany). To analyze ammonia (NH<sub>4</sub><sup>+</sup>), we extracted 2g sediment with 4mL 2M KCl for 1hr  
397 on a reciprocal shaker. Extracts were filtered (0.22 um) and NH<sub>4</sub> was measured with Hach Kit  
398 2604545 (Hach, Loveland, Co). Fe(II) content was assessed by ferrozine<sup>66</sup>. Briefly, 1g  
399 sediment was extracted for 1hr with 10 mL 0.5N HCl with 200 rpm shaking in an anaerobic  
400 chamber and filtered through 0.22um PTFE syringe filters. One mL of filtrate and 1 mL  
401 Ferrozine were combined in a 1.5 mL, and fluorescence was measured at 562 nm to determine  
402 Fe(II) content. Total Fe was determined by inductively coupled plasma (ICP), and Fe(III) was  
403 calculated as the difference between Fe(II) and total Fe. All other ion concentrations were  
404 measured by ICP on 0.5N HCl extractions, as described above.

405           In addition, we assessed aerobic metabolism in each sample with a resazurin reduction  
406 assay, modified from Haggerty *et al.*<sup>67</sup>. We added 6ml of filtered river water from the Columbia  
407 River to four replicate 1 cc subsamples, taken with a cut-off syringe, from each depth. One  
408 replicate vial from each location was heat killed in a 90°C water bath for 1 hour, and cooled on  
409 ice to bring back to 4°C. Resazurin incubations were started by adding 200µl of 30µM resazurin  
410 to vials when cold, gently mixing and then incubating on an angle at 50rpm and 21°C. After 4hr,  
411 vials were weighed and 6mL acetonitrile (ACN) added to begin a 1hr extraction. After ACN  
412 addition, vials were sealed, vortexed and weighed again before being placed in a sonicator bath  
413 for 10min. After sonication, vials were put back on the 50rpm shaker. After a 1hr extraction,  
414 vials were vortexed and sand was allowed to settle. The screw cap was removed to allow extract  
415 to be drawn into a 5-mL syringe fitted with a 20G needle. Extracts were filtered with 33mm,  
416 0.2µm syringe filters (PES, Millex by Millipore) into pre-labeled 12-mL amber vials  
417 (Thermoscientific) and stored at 4°C. The vial with the remaining sand was dried in a convection  
418 oven at 75 °C for at least 72 hrs then weighed. Fluorescence emission maxima for resazurin  
419 (630nm) and resorufin (585nm) were measured on resazurin sample extracts using a Horiba  
420 Fluorolog 3 fluorimeter. 2mL extract was added to 0.2mL 100mM HEPES (pH 8) in quartz  
421 cuvettes and fluorescence intensity quantified by comparison to resazurin and resorufin standards  
422 made up in ACN:H<sub>2</sub>O (1:1).

423

424

425 *FT-ICR-MS solvent extraction.*

426           Three solvents—water (H<sub>2</sub>O), methanol (CH<sub>3</sub>OH, hereafter “MeOH”) and chloroform  
427 (CHCl<sub>3</sub>)—with different polarities were used to sequentially extract different classes of organic

428 compounds from samples according to Tfaily et al.<sup>10,11</sup> Water extractions were performed first,  
429 followed by MeOH and CHCl<sub>3</sub>. Water is selective for carbohydrates with high O/OC ratios,  
430 amino-sugars and other labile polar compounds; MeOH is selective for compounds with  
431 relatively low O/OC ratios and finally CHCl<sub>3</sub> is selective for lipid-like compounds<sup>10</sup>. Extracts  
432 were prepared by adding 1 ml of solvent to 100 mg bulk soil and shaking in 2 mL capped glass  
433 vials for two hours on an Eppendorf Thermomixer. Samples were removed from the shaker and  
434 left to stand before spinning down and pulling off the supernatant to stop the extraction. The soil  
435 residue was dried with nitrogen gas to remove any residual solvent, and then the next solvent  
436 was added. The CHCl<sub>3</sub> and H<sub>2</sub>O extracts were diluted in MeOH to improve ESI efficiency. SOC  
437 extraction efficiency was estimated to be around 15% measured using protocol developed by  
438 Tfaily et al.<sup>10</sup>.

439

#### 440 *FT-ICR-MS data acquisition and analysis.*

441 Ultrahigh resolution characterization of the three different extracts from each sample was  
442 carried out using a 12 Tesla Bruker Solarix Fourier transform ion cyclotron resonance (FT-ICR)  
443 mass spectrometer (MS) located at the Environmental Molecular Sciences Laboratory (EMSL) in  
444 Richland, WA, USA. Samples were injected directly into the mass spectrometer and the ion  
445 accumulation time was optimized for all samples to account for differences in OC concentration,  
446 so that all samples injected into the mass spectrometer had similar concentration. A standard  
447 Bruker electrospray ionization (ESI) source was used to generate negatively charged molecular  
448 ions. Samples were introduced to the ESI source equipped with a fused silica tube (30  $\mu$ m i.d.)  
449 through an Agilent 1200 series pump (Agilent Technologies) at a flow rate of 3.0  $\mu$ L min<sup>-1</sup>.  
450 Experimental conditions were as follows: needle voltage, +4.4 kV; Q1 set to 50  $m/z$ ; and the

451 heated resistively coated glass capillary operated at 180 °OC. One hundred forty-four individual  
452 scans were averaged for each sample and internally calibrated using an organic matter  
453 homologous series separated by 14 Da (–CH<sub>2</sub> groups). The mass measurement accuracy was less  
454 than 1 ppm for singly charged ions across a broad  $m/z$  range (100-1200  $m/z$ ). The mass resolution  
455 was ~ 350K at 339  $m/z$ . Data Analysis software (BrukerDaltonik version 4.2) was used to  
456 convert raw spectra to a list of  $m/z$  values applying FTMS peak picker with a signal-to-noise  
457 ratio (S/N) threshold set to 7 and absolute intensity threshold to the default value of 100.  
458 Chemical formulae were then assigned using in-house built software following the Compound  
459 Identification Algorithm (CIA), described by Kujawinski and Behn<sup>68</sup> and modified by Minor et  
460 al.<sup>69</sup>. Chemical formulae were assigned based on the following criteria: S/N >7, and mass  
461 measurement error <1 ppm, taking into consideration the presence of OC, H, O, N, S and P and  
462 excluding other elements.

463 To aid in the interpretation of the large data sets, the chemical character of thousands of  
464 features for each sample's ESI FTICR-MS spectrum was evaluated on van Krevelen diagrams.  
465 Compounds were plotted on the van Krevelen diagram on the basis of their molar H:OC ratios  
466 (y-axis) and molar O:OC ratios (x-axis). Van Krevelen diagrams provide a means to visualize  
467 and compare the average properties of OM and assign compounds to the major biochemical  
468 classes (*i.e.*, lipid-, protein-, lignin-, unsaturated hydrocarbon-, and condensed hydrocarbon-like).  
469 In this study, biochemical compound classes are reported as relative abundance values based on  
470 counts of OC, H, and O for the following H:OC and O:OC ranges; lipids ( $0 < O:OC \leq 0.3$ ,  $1.5 \leq$   
471  $H:OC \leq 2.5$ ), unsaturated hydrocarbons ( $0 \leq O:OC \leq 0.125$ ,  $0.8 \leq H:OC < 2.5$ ), proteins ( $0.3 <$   
472  $O:OC \leq 0.55$ ,  $1.5 \leq H:OC \leq 2.3$ ), amino sugars ( $0.55 < O:OC \leq 0.7$ ,  $1.5 \leq H:OC \leq 2.2$ ), lignin  
473 ( $0.125 < O:OC \leq 0.65$ ,  $0.8 \leq H:OC < 1.5$ ), tannins ( $0.65 < O:OC \leq 1.1$ ,  $0.8 \leq H:OC < 1.5$ ), and

474 condensed hydrocarbons ( $0 \leq 200 \text{ O:OC} \leq 0.95$ ,  $0.2 \leq \text{H:OC} < 0.8$ )<sup>10</sup>. To identify potential  
475 microbial transformation pathways, the mass difference between m/z peaks extracted from each  
476 spectrum with  $S/N > 7$  were compared to commonly observed mass difference for common  
477 metabolic transformations<sup>70</sup>.

478

#### 479 *Statistical Methods.*

480 All statistical analyses were conducted using R software (<https://www.r-project.org/>), and  
481 FT-ICR m/z intensities were converted into presence/absence data prior to analysis as per  
482 Kujawinski and Behn<sup>68</sup> and Minor et al.<sup>69</sup>. To examine differences in OC composition between  
483 transects, we constructed a Sorenson dissimilarity matrix for all m/z's identified (i.e., both  
484 assigned and unassigned peaks) within each OC pool ('vegan' package). Differences between  
485 transects were tested with PERMANOVA (999 permutations, 'vegan') and visualized using  
486 Non-metric Multidimensional Scaling (NMDS, 'vegan'). One sample (NR, profile 1, depth 30-  
487 40cm) was removed due to peak interference during FT-ICR-MS, and three samples (NR, profile  
488 2, depths 00-10cm, 10-20cm, 20-30cm) were excluded because were unable to collect sufficient  
489 sample mass for all analyses.

490 Further, we inferred the biochemistry of OC oxidation at R vs. NR by correlating  
491 chemical transformations in each OC pool to rates of metabolism. Chemical transformations  
492 were identified as mass differences in known biochemical pathways between peaks detected by  
493 FT-ICR-MS (i.e., the mass gained or lost in reactions, see Fig. 2). The number of times each  
494 chemical transformations occurred in sample was summed and correlated to aerobic metabolism  
495 (resazurin assay) using Pearson's product-moment correlation coefficient. Positive relationships  
496 were inferred to denote possible processes of biotic OC oxidation. We also constructed Bray-

497 Curtis dissimilarity matrices of transformations that positively correlated with aerobic  
498 metabolism, visualized them by vegetation state with non-metric Multidimensional Scaling  
499 visualization (NMDS, ‘vegan’), and statistically evaluated them with PERMANOVA (999  
500 permutations, ‘vegan’).

501 We also assessed metabolic pathways associated with OC transformations by mapping  
502 each peak (i.e., m/z in FT-ICR-MS data) that positively correlated to aerobic metabolism to the  
503 Kyoto Encyclopedia of Genes and Genomes (KEGG, Release 80.0, <http://www.kegg.jp>)<sup>31</sup> using  
504 an in-house software. By doing so, we were able to assess the potential metabolic pathway that  
505 produced or utilized this particular compound and the potential Enzyme Commission number  
506 catalyzing this particular reaction. As per C transformations, we correlated the abundance of  
507 KEGG pathways to aerobic metabolism and inferred positive correlations as significant  
508 microbial pathways contributing to OC oxidation. The number of times each positively  
509 correlated KEGG pathway occurred in each sample was normalized by the total number of  
510 pathways detected in the sample to yield data as a relative abundance. The normalized  
511 abundance of each pathway was clustered using hierarchical clustering and visualized using the  
512 ‘pheatmap’ package in R. Clusters were determined using the ‘hclust’ algorithm in R with the  
513 ‘complete linkage’ clustering method.

514 Finally, we examined associations between aerobic metabolism, and thermodynamics by  
515 calculating the Gibbs Free Energy of OC oxidation ( $\Delta G_{\text{Cox}}$ ) from the Nominal Oxidation State of  
516 Carbon (NOSC) as per La Rowe and Van Cappellen<sup>46</sup>. NOSC is calculated from the number of  
517 electrons transferred in OC oxidation half reactions and is defined by the equation:

518 (1) 
$$\text{NOSC} = -((-Z + 4a + b - 3c - 2d + 5e - 2f)/a) + 4$$



519 , where a, b, c, d, e, and f are the stoichiometric numbers of elements OC, H, N, O, P, S in  
520 organic material and Z is net charge of organic compound. This method utilizes stoichiometric  
521 elemental ratios of organic matter to infer thermodynamics associated with OC half reactions and  
522 is determined from the equation:

$$523 \quad (2) \Delta G_{\text{Cox}} = 60.3 - 28.5(\text{NOSC})$$

524 Values of  $\Delta G_{\text{Cox}}$  are generally positive, indicating that OC oxidation must be coupled to the  
525 reduction of a terminal electron acceptor for a thermodynamically favorable reaction, and higher  
526  $\Delta G_{\text{Cox}}$  denotes a less thermodynamically favorable compound. Here, we assessed relationships  
527 between aerobic metabolism and  $\Delta G_{\text{Cox}}$  of OC compounds in each OC pool using linear  
528 regressions in each transect, in which aerobic metabolism was the independent variable and  
529  $\Delta G_{\text{Cox}}$  was the dependent variable.

530

531

### 532 **Author Contributions.**

533 EBG was responsible for conceptual development and data analysis and was the primary writer  
534 with guidance from JCS and MT. ARC, AEG, CTR, ECR, DWK, and JCS were responsible for  
535 experimental design and data collection. MT was responsible for all FT-ICR processing. All  
536 authors contributed to manuscript revisions.

537

### 538 **Author Information.**

539 Reprints and permissions information is available at [www.nature.com/reprints](http://www.nature.com/reprints). We declare no  
540 competing financial interests. Correspondence and requests for materials should be addressed to  
541 [emily.graham@pnnl.gov](mailto:emily.graham@pnnl.gov).

542

543 **Acknowledgements.**

544 This research was supported by the US Department of Energy (DOE), Office of

545 Biological and Environmental Research (BER), as part of Subsurface Biogeochemical

546 Research Program's Scientific Focus Area (SFA) at the Pacific Northwest National

547 Laboratory (PNNL). PNNL is operated for DOE by Battelle under contract

548 DE-AC06-76RLO 1830. A portion of the research was performed at Environmental Molecular

549 Science Laboratory User Facility.

550

551 **Figure 1. NMDS visualization of dissimilarity in OC pool composition.** Water-soluble and  
552 bound-OC pools are represented by open circles and x's, respectively. Samples associated with  
553 riparian vegetation are blue, and those in areas without vegetation are red. The P-value reflects  
554 differences among all groups, as assessed by PERMANOVA. Within each extraction, the  
555 composition of OC pools was significantly different across vegetation states (both  $P = 0.001$ ).

556  
557 **Figure 2. Methodology for inferring biochemical transformations and metabolic pathways.**

558 (a) Biochemical OC transformations were calculated by identifying known mass transfers in  
559 biochemical transformations. For each transformation, the peaks (i.e., products and reactants)  
560 between which masses were transferred were mapped to metabolic (KEGG) pathways. (b)  
561 Biochemical transformations and metabolic pathways were then correlated to aerobic  
562 metabolism to garner insights into OC oxidation processes.

563  
564 **Figure 3. NMDS visualization of C transformation partitioning among transects.** The  
565 identities of transformations that correlated to aerobic metabolism were significantly different  
566 among vegetation states in both the (a) water-soluble and (b) bound-OC pools. R and NR are  
567 denoted in blue and red, respectively, and significance values are derived from PERMANOVA.

568  
569 **Figure 4. KEGG pathways associated with aerobic metabolism.** A hierarchical clustering  
570 heatmap shows KEGG pathways positively associated with aerobic metabolism. Colors move  
571 from white to red from a scale of 0% to 20%, showing percent relative abundance of each  
572 pathway in each group. Clusters were calculated using the 'complete linkage' method in the R  
573 command 'hclust'. Pathways are described and divided by cluster and listed in the legend. RW,

574 RC, NRW, and NRC are placed on branches that yield clusters with which they are  
575 predominantly associated.

576

577 **Figure 5. Correlations between Gibbs Free Energy of carbon oxidation and aerobic**

578 **metabolism.** (a) and (b) display linear regressions between aerobic metabolism and the Gibbs

579 Free Energy of Carbon Oxidation( $\Delta G_{\text{Cox}}$ ) in water-soluble and bound-OC pools, respectively. R

580 and NR are denoted in blue and red. Solid lines show significant relationships at R; dashed lines

581 show significant relationships at NR.

582

583 **Figure 6. Conceptualization of relationship between riparian vegetation and OC oxidation.**

584 We propose a conceptualization of OC oxidation at terrestrial-aquatic interfaces whereby (a)

585 areas deplete in riparian vegetation experience lower inputs to water-soluble OC pools coincident

586 with lower rates of oxidation. This results in overall smaller OC pools (both water-soluble and

587 bound) and greater comparative oxidation of the bound-OC pool. Conversely, more riparian

588 vegetation (b) results in greater terrestrial C deposition and larger water-soluble and bound-OC

589 pools. However, water-soluble OC is preferentially oxidized, resulting in a more stabilized

590 bound-OC pool. (b) In both cases, thermodynamically-favorable portions of OC pools are

591 oxidized, but discrete OC pools are metabolized in the presence or absence of riparian

592 vegetation. Boxes denote pool sizes, and the thickness of arrow denotes flux magnitude.

593

594 **Table 1. Abbreviations and Acronyms.**

595

596 **Table 2. C transformations correlating with aerobic metabolism.**

- 597  
598  
599
- 600 1 Burd, A. B. *et al.* Terrestrial and marine perspectives on modeling organic matter  
601 degradation pathways. *Global change biology* **22**, 121-136 (2016).
- 602 2 Todd-Brown, K. *et al.* Causes of variation in soil carbon simulations from CMIP5 Earth  
603 system models and comparison with observations. *Biogeosciences* **10** (2013).
- 604 3 Wieder, W. R., Bonan, G. B. & Allison, S. D. Global soil carbon projections are  
605 improved by modelling microbial processes. *Nature Climate Change* **3**, 909-912 (2013).
- 606 4 Wieder, W. R., Cleveland, C. C., Smith, W. K. & Todd-Brown, K. Future productivity  
607 and carbon storage limited by terrestrial nutrient availability. *Nature Geoscience* **8**, 441-  
608 444 (2015).
- 609 5 Battin, T. J. *et al.* The boundless carbon cycle. *Nature Geoscience* **2**, 598-600 (2009).
- 610 6 Aalto, R. *et al.* Episodic sediment accumulation on Amazonian flood plains influenced by  
611 El Nino/Southern Oscillation. *Nature* **425**, 493-497 (2003).
- 612 7 Battin, T. J. *et al.* Biophysical controls on organic carbon fluxes in fluvial networks.  
613 *Nature Geoscience* **1**, 95-100 (2008).
- 614 8 Regnier, P. *et al.* Anthropogenic perturbation of the carbon fluxes from land to ocean.  
615 *Nature geoscience* **6**, 597-607 (2013).
- 616 9 Mason, H., Begg, J., Maxwell, R. S., Kersting, A. B. & Zavarin, M. A novel solid-state  
617 NMR method for the investigation of trivalent lanthanide sorption on amorphous silica at  
618 low surface loadings. *Environmental Science: Processes & Impacts* (2016).
- 619 10 Tfaily, M. M. *et al.* Advanced solvent based methods for molecular characterization of  
620 soil organic matter by high-resolution mass spectrometry. *Analytical chemistry* **87**, 5206-  
621 5215 (2015).
- 622 11 Tfaily, M. M. *et al.* Sequential extraction protocol for organic matter from soils and  
623 sediments using high resolution mass spectrometry and proton NMR. (In review).
- 624 12 Schmidt, M. W. *et al.* Persistence of soil organic matter as an ecosystem property. *Nature*  
625 **478**, 49-56 (2011).
- 626 13 Hedges, J. & Oades, J. Comparative organic geochemistries of soils and marine  
627 sediments. *Organic geochemistry* **27**, 319-361 (1997).
- 628 14 Hedges, J. I. *et al.* The molecularly-uncharacterized component of nonliving organic  
629 matter in natural environments. *Organic Geochemistry* **31**, 945-958 (2000).
- 630 15 Kuzyakov, Y. Priming effects: interactions between living and dead organic matter. *Soil*  
631 *Biology and Biochemistry* **42**, 1363-1371 (2010).
- 632 16 Guenet, B., Danger, M., Abbadie, L. & Lacroix, G. Priming effect: bridging the gap  
633 between terrestrial and aquatic ecology. *Ecology* **91**, 2850-2861 (2010).
- 634 17 Bengtsson, M. M. *et al.* No evidence of aquatic priming effects in hyporheic zone  
635 microcosms. *Scientific reports* **4**, 5187 (2014).
- 636 18 Bianchi, T. S. The role of terrestrially derived organic carbon in the coastal ocean: A  
637 changing paradigm and the priming effect. *Proceedings of the National Academy of*  
638 *Sciences* **108**, 19473-19481 (2011).
- 639 19 Hunter, W. R. *et al.* Metabolism of mineral - sorbed organic matter and microbial  
640 lifestyles in fluvial ecosystems. *Geophysical Research Letters* (2016).
- 641 20 Hedges, J. I. & Keil, R. G. Sedimentary organic matter preservation: an assessment and  
642 speculative synthesis. *Marine chemistry* **49**, 81-115 (1995).

- 643 21 Rothman, D. H. & Forney, D. C. Physical model for the decay and preservation of marine  
644 organic carbon. *Science* **316**, 1325-1328 (2007).
- 645 22 Dorado-García, I., Syväranta, J., Devlin, S. P., Medina-Sánchez, J. M. & Jones, R. I.  
646 Experimental assessment of a possible microbial priming effect in a humic boreal lake.  
647 *Aquatic Sciences* **78**, 191-202 (2016).
- 648 23 Catalán, N., Kellerman, A. M., Peter, H., Carmona, F. & Tranvik, L. J. Absence of a  
649 priming effect on dissolved organic carbon degradation in lake water. *Limnology and*  
650 *Oceanography* **60**, 159-168 (2015).
- 651 24 Cotrufo, M. F., Wallenstein, M. D., Boot, C. M., Deneff, K. & Paul, E. The Microbial  
652 Efficiency - Matrix Stabilization (MEMS) framework integrates plant litter  
653 decomposition with soil organic matter stabilization: do labile plant inputs form stable  
654 soil organic matter? *Global Change Biology* **19**, 988-995 (2013).
- 655 25 Lehmann, J. & Kleber, M. The contentious nature of soil organic matter. *Nature* **528**, 60-  
656 68 (2015).
- 657 26 Ebel, W. J., Becker, C. D., Mullan, J. W. & Raymond, H. L. The Columbia River--  
658 toward a holistic understanding. *Canadian special publication of fisheries and aquatic*  
659 *sciences/Publication speciale canadienne des sciences halieutiques et aquatiques*. 1989.  
660 (1989).
- 661 27 Moser, D. P. *et al.* Biogeochemical processes and microbial characteristics across  
662 groundwater-surface water boundaries of the Hanford Reach of the Columbia River.  
663 *Environmental Science & Technology* **37**, 5127-5134 (2003).
- 664 28 Graham, E. B. *et al.* Dissolved organic matter and inorganic mercury loadings favor  
665 novel methylators and fermentation metabolisms in oligotrophic sediments. *bioRxiv*,  
666 072017 (2016).
- 667 29 Castle, S. C. *et al.* Biogeochemical drivers of microbial community convergence across  
668 actively retreating glaciers. *Soil Biology and Biochemistry* **101**, 74-84 (2016).
- 669 30 Foley, J. A. *et al.* Global consequences of land use. *science* **309**, 570-574 (2005).
- 670 31 Kanehisa, M. & Goto, S. KEGG: kyoto encyclopedia of genes and genomes. *Nucleic*  
671 *acids research* **28**, 27-30 (2000).
- 672 32 Agati, G., Azzarello, E., Pollastri, S. & Tattini, M. Flavonoids as antioxidants in plants:  
673 location and functional significance. *Plant Science* **196**, 67-76 (2012).
- 674 33 Tholl, D. in *Biotechnology of Isoprenoids* 63-106 (Springer, 2015).
- 675 34 Willaman, J. J. & Schubert, B. G. *Alkaloid-bearing plants and their contained alkaloids*.  
676 (Agricultural Research Service, US Department of Agriculture, 1961).
- 677 35 Trail, F., Mahanti, N. & Linz, J. Molecular biology of aflatoxin biosynthesis.  
678 *Microbiology* **141**, 755-765 (1995).
- 679 36 Hahlbrock, K. & Scheel, D. Physiology and molecular biology of phenylpropanoid  
680 metabolism. *Annual review of plant biology* **40**, 347-369 (1989).
- 681 37 Shepherd, T. & Wynne Griffiths, D. The effects of stress on plant cuticular waxes. *New*  
682 *Phytologist* **171**, 469-499 (2006).
- 683 38 Raffaele, S., Leger, A. & Roby, D. Very long chain fatty acid and lipid signaling in the  
684 response of plants to pathogens. *Plant signaling & behavior* **4**, 94-99 (2009).
- 685 39 King, A., Nam, J.-W., Han, J., Hilliard, J. & Jaworski, J. G. Cuticular wax biosynthesis in  
686 petunia petals: cloning and characterization of an alcohol-acyltransferase that synthesizes  
687 wax-esters. *Planta* **226**, 381-394 (2007).



- 688 40 Crawford, M. *et al.* Role of plant-derived omega-3 fatty acids in human nutrition. *Annals*  
689 *of Nutrition and Metabolism* **44**, 263-265 (2000).
- 690 41 Creelman, R. A. & Mulpuri, R. The oxylipin pathway in Arabidopsis. *The Arabidopsis*  
691 *Book*, e0012 (2002).
- 692 42 Bishop, G. J. Refining the plant steroid hormone biosynthesis pathway. *Trends in plant*  
693 *science* **12**, 377-380 (2007).
- 694 43 Hedin, L. O. *et al.* Thermodynamic constraints on nitrogen transformations and other  
695 biogeochemical processes at soil-stream interfaces. *Ecology* **79**, 684-703 (1998).
- 696 44 Burgin, A. J., Yang, W. H., Hamilton, S. K. & Silver, W. L. Beyond carbon and nitrogen:  
697 how the microbial energy economy couples elemental cycles in diverse ecosystems.  
698 *Frontiers in Ecology and the Environment* **9**, 44-52 (2011).
- 699 45 Helton, A. M., Ardón, M. & Bernhardt, E. S. Thermodynamic constraints on the utility of  
700 ecological stoichiometry for explaining global biogeochemical patterns. *Ecology letters*  
701 **18**, 1049-1056 (2015).
- 702 46 LaRowe, D. E. & Van Cappellen, P. Degradation of natural organic matter: a  
703 thermodynamic analysis. *Geochimica et Cosmochimica Acta* **75**, 2030-2042 (2011).
- 704 47 Blagodatskaya, E. & Kuzyakov, Y. Mechanisms of real and apparent priming effects and  
705 their dependence on soil microbial biomass and community structure: critical review.  
706 *Biology and Fertility of Soils* **45**, 115-131 (2008).
- 707 48 Fang, J. *et al.* Precipitation patterns alter growth of temperate vegetation. *Geophysical*  
708 *research letters* **32** (2005).
- 709 49 Knapp, A. K. *et al.* Consequences of more extreme precipitation regimes for terrestrial  
710 ecosystems. *Bioscience* **58**, 811-821 (2008).
- 711 50 Smith, R. M. & Kaushal, S. S. Carbon cycle of an urban watershed: exports, sources, and  
712 metabolism. *Biogeochemistry* **126**, 173-195 (2015).
- 713 51 Imberger, S. J., Thompson, R. M. & Grace, M. R. Urban catchment hydrology  
714 overwhelms reach scale effects of riparian vegetation on organic matter dynamics.  
715 *Freshwater Biology* **56**, 1370-1389 (2011).
- 716 52 Fraley, L. M., Miller, A. J. & Welty, C. Contribution of In - Channel Processes to  
717 Sediment Yield of an Urbanizing Watershed1. *JAWRA Journal of the American Water*  
718 *Resources Association* **45**, 748-766 (2009).
- 719 53 Graeber, D., Gelbrecht, J., Pusch, M. T., Anlanger, C. & von Schiller, D. Agriculture has  
720 changed the amount and composition of dissolved organic matter in Central European  
721 headwater streams. *Science of the Total Environment* **438**, 435-446 (2012).
- 722 54 Larson, J. H. *et al.* Relationships between land cover and dissolved organic matter change  
723 along the river to lake transition. *Ecosystems* **17**, 1413-1425 (2014).
- 724 55 Six, J. *et al.* Measuring and understanding carbon storage in afforested soils by physical  
725 fractionation. *Soil science society of America journal* **66**, 1981-1987 (2002).
- 726 56 Zachara, J. M. *et al.* Persistence of uranium groundwater plumes: Contrasting  
727 mechanisms at two DOE sites in the groundwater-river interaction zone. *Journal of*  
728 *Contaminant Hydrology* **147**, 45-72 (2013).
- 729 57 Slater, L. D. *et al.* Use of electrical imaging and distributed temperature sensing methods  
730 to characterize surface water-groundwater exchange regulating uranium transport at the  
731 Hanford 300 Area, Washington. *Water Resources Research* **46** (2010).
- 732 58 Graham, E. B. *et al.* Coupling spatiotemporal community assembly processes to changes  
733 in microbial metabolism. *Frontiers in Microbiology* **7**, 1949 (2016).

- 734 59 Lin, X. *et al.* Spatial and temporal dynamics of the microbial community in the Hanford  
735 unconfined aquifer. *The ISME Journal* **6**, 1665-1676 (2012).
- 736 60 Stegen, J. C., Lin, X., Konopka, A. E. & Fredrickson, J. K. Stochastic and deterministic  
737 assembly processes in subsurface microbial communities. *The ISME Journal* **6**, 1653-  
738 1664 (2012).
- 739 61 Arntzen, E. V., Geist, D. R. & Dresel, P. E. Effects of fluctuating river flow on  
740 groundwater/surface water mixing in the hyporheic zone of a regulated, large cobble bed  
741 river. *River Research and Applications* **22**, 937-946 (2006).
- 742 62 Peterson, R. E. & Connelly, M. P. Water movement in the zone of interaction between  
743 groundwater and the Columbia River, Hanford site, Washington. *Journal of Hydraulic*  
744 *Research* **42**, 53-58 (2004).
- 745 63 Stegen, J. C. *et al.* Groundwater-surface water mixing shifts ecological assembly  
746 processes and stimulates organic carbon turnover. *Nature Communications* **7** (2016).
- 747 64 Lotspeich, F. B. & Reid, B. H. Tri-tube freeze-core procedure for sampling stream  
748 gravels. *The Progressive Fish-Culturist* **42**, 96-99 (1980).
- 749 65 Rood, K. & Church, M. Modified freeze-core technique for sampling the permanently  
750 wetted streambed. *North American Journal of Fisheries Management* **14**, 852-861  
751 (1994).
- 752 66 Stookey, L. L. Ferrozine---a new spectrophotometric reagent for iron. *Analytical*  
753 *chemistry* **42**, 779-781 (1970).
- 754 67 Haggerty, R., Martí, E., Argerich, A., Von Schiller, D. & Grimm, N. B. Resazurin as a  
755 “smart” tracer for quantifying metabolically active transient storage in stream  
756 ecosystems. *Journal of Geophysical Research: Biogeosciences* **114** (2009).
- 757 68 Kujawinski, E. B. & Behn, M. D. Automated analysis of electrospray ionization Fourier  
758 transform ion cyclotron resonance mass spectra of natural organic matter. *Analytical*  
759 *Chemistry* **78**, 4363-4373 (2006).
- 760 69 Minor, E. C., Steinbring, C. J., Longnecker, K. & Kujawinski, E. B. Characterization of  
761 dissolved organic matter in Lake Superior and its watershed using ultrahigh resolution  
762 mass spectrometry. *Organic Geochemistry* **43**, 1-11 (2012).
- 763 70 Breitling, R., Ritchie, S., Goodenowe, D., Stewart, M. L. & Barrett, M. P. Ab initio  
764 prediction of metabolic networks using Fourier transform mass spectrometry data.  
765 *Metabolomics* **2**, 155-164 (2006).
- 766



P = 0.02

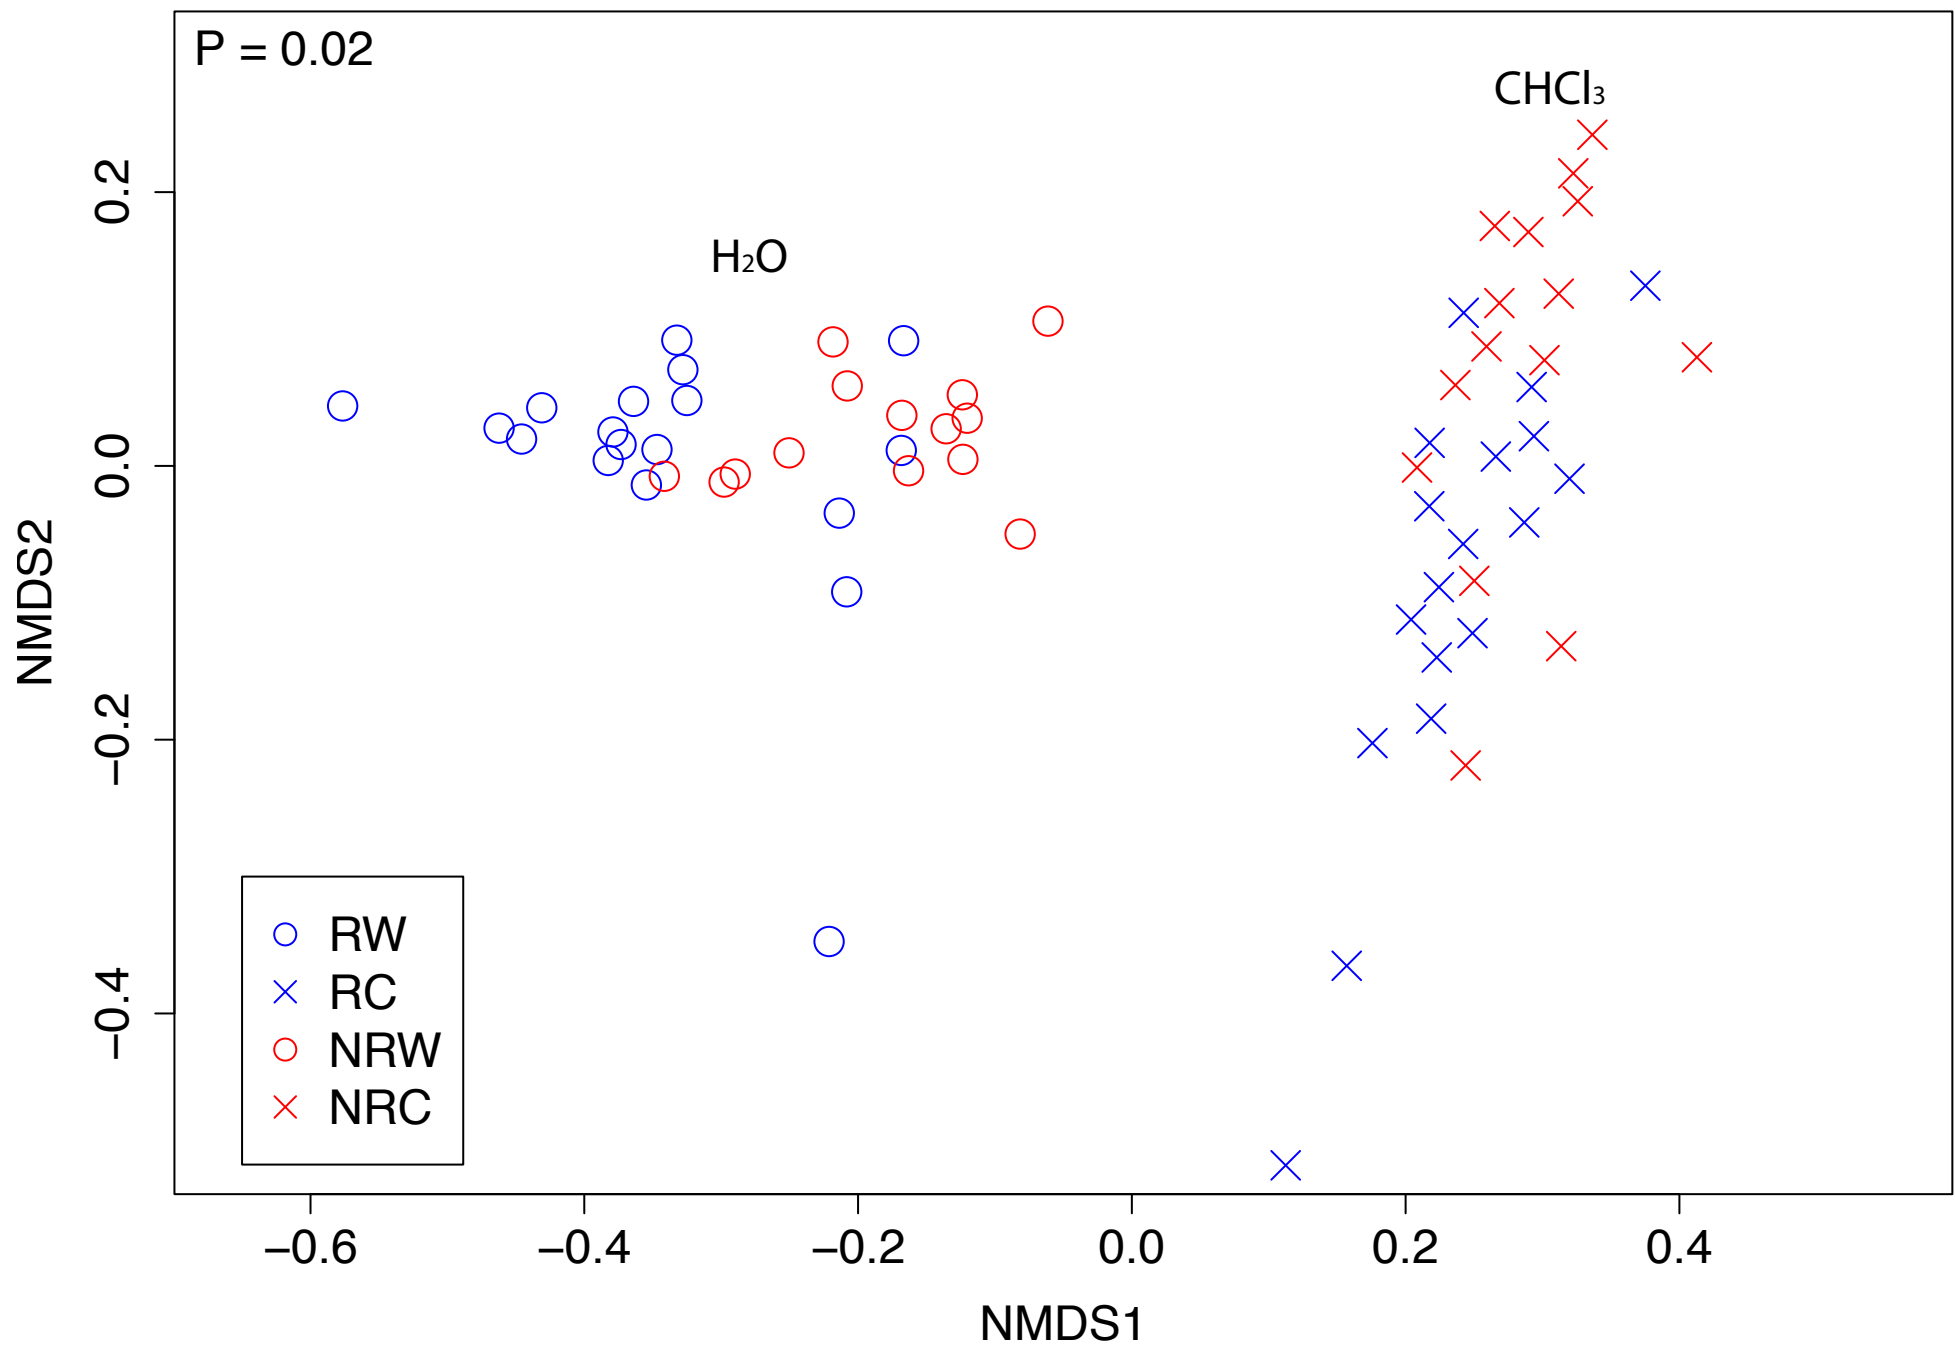

a

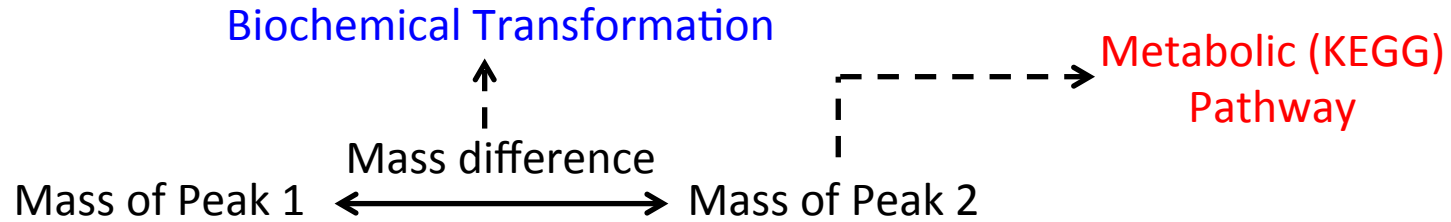

b

Times **biochemical transformation** observed in sample

----->  
Pearson Product-Moment  
Correlation with aerobic  
metabolism

**Biochemical pathway** related to aerobic metabolism

Times **metabolic pathway** observed in sample

----->

**Metabolic pathway** related to aerobic metabolism

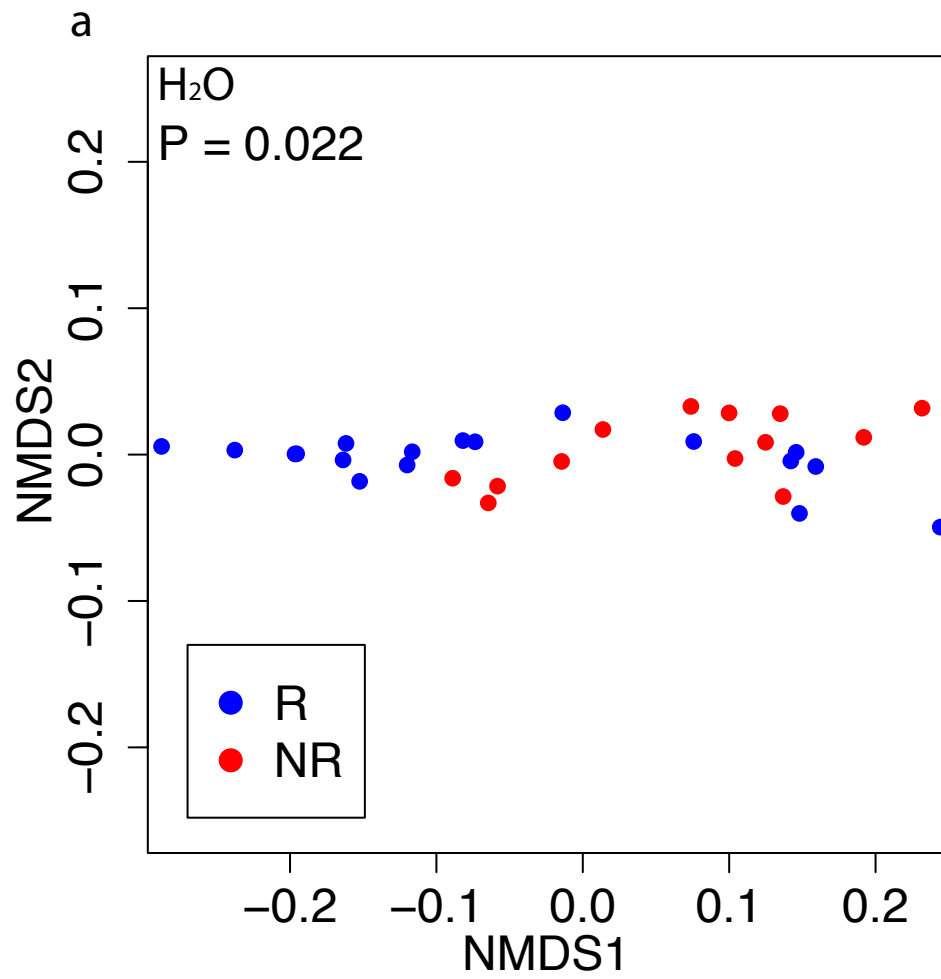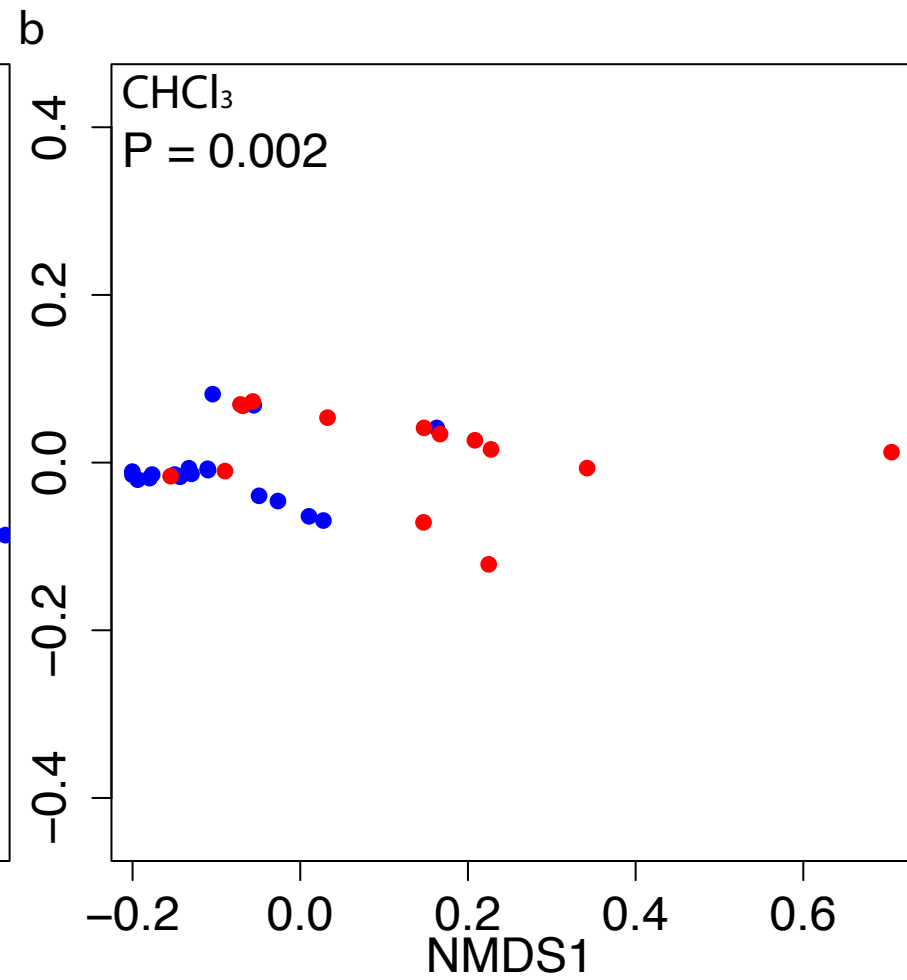

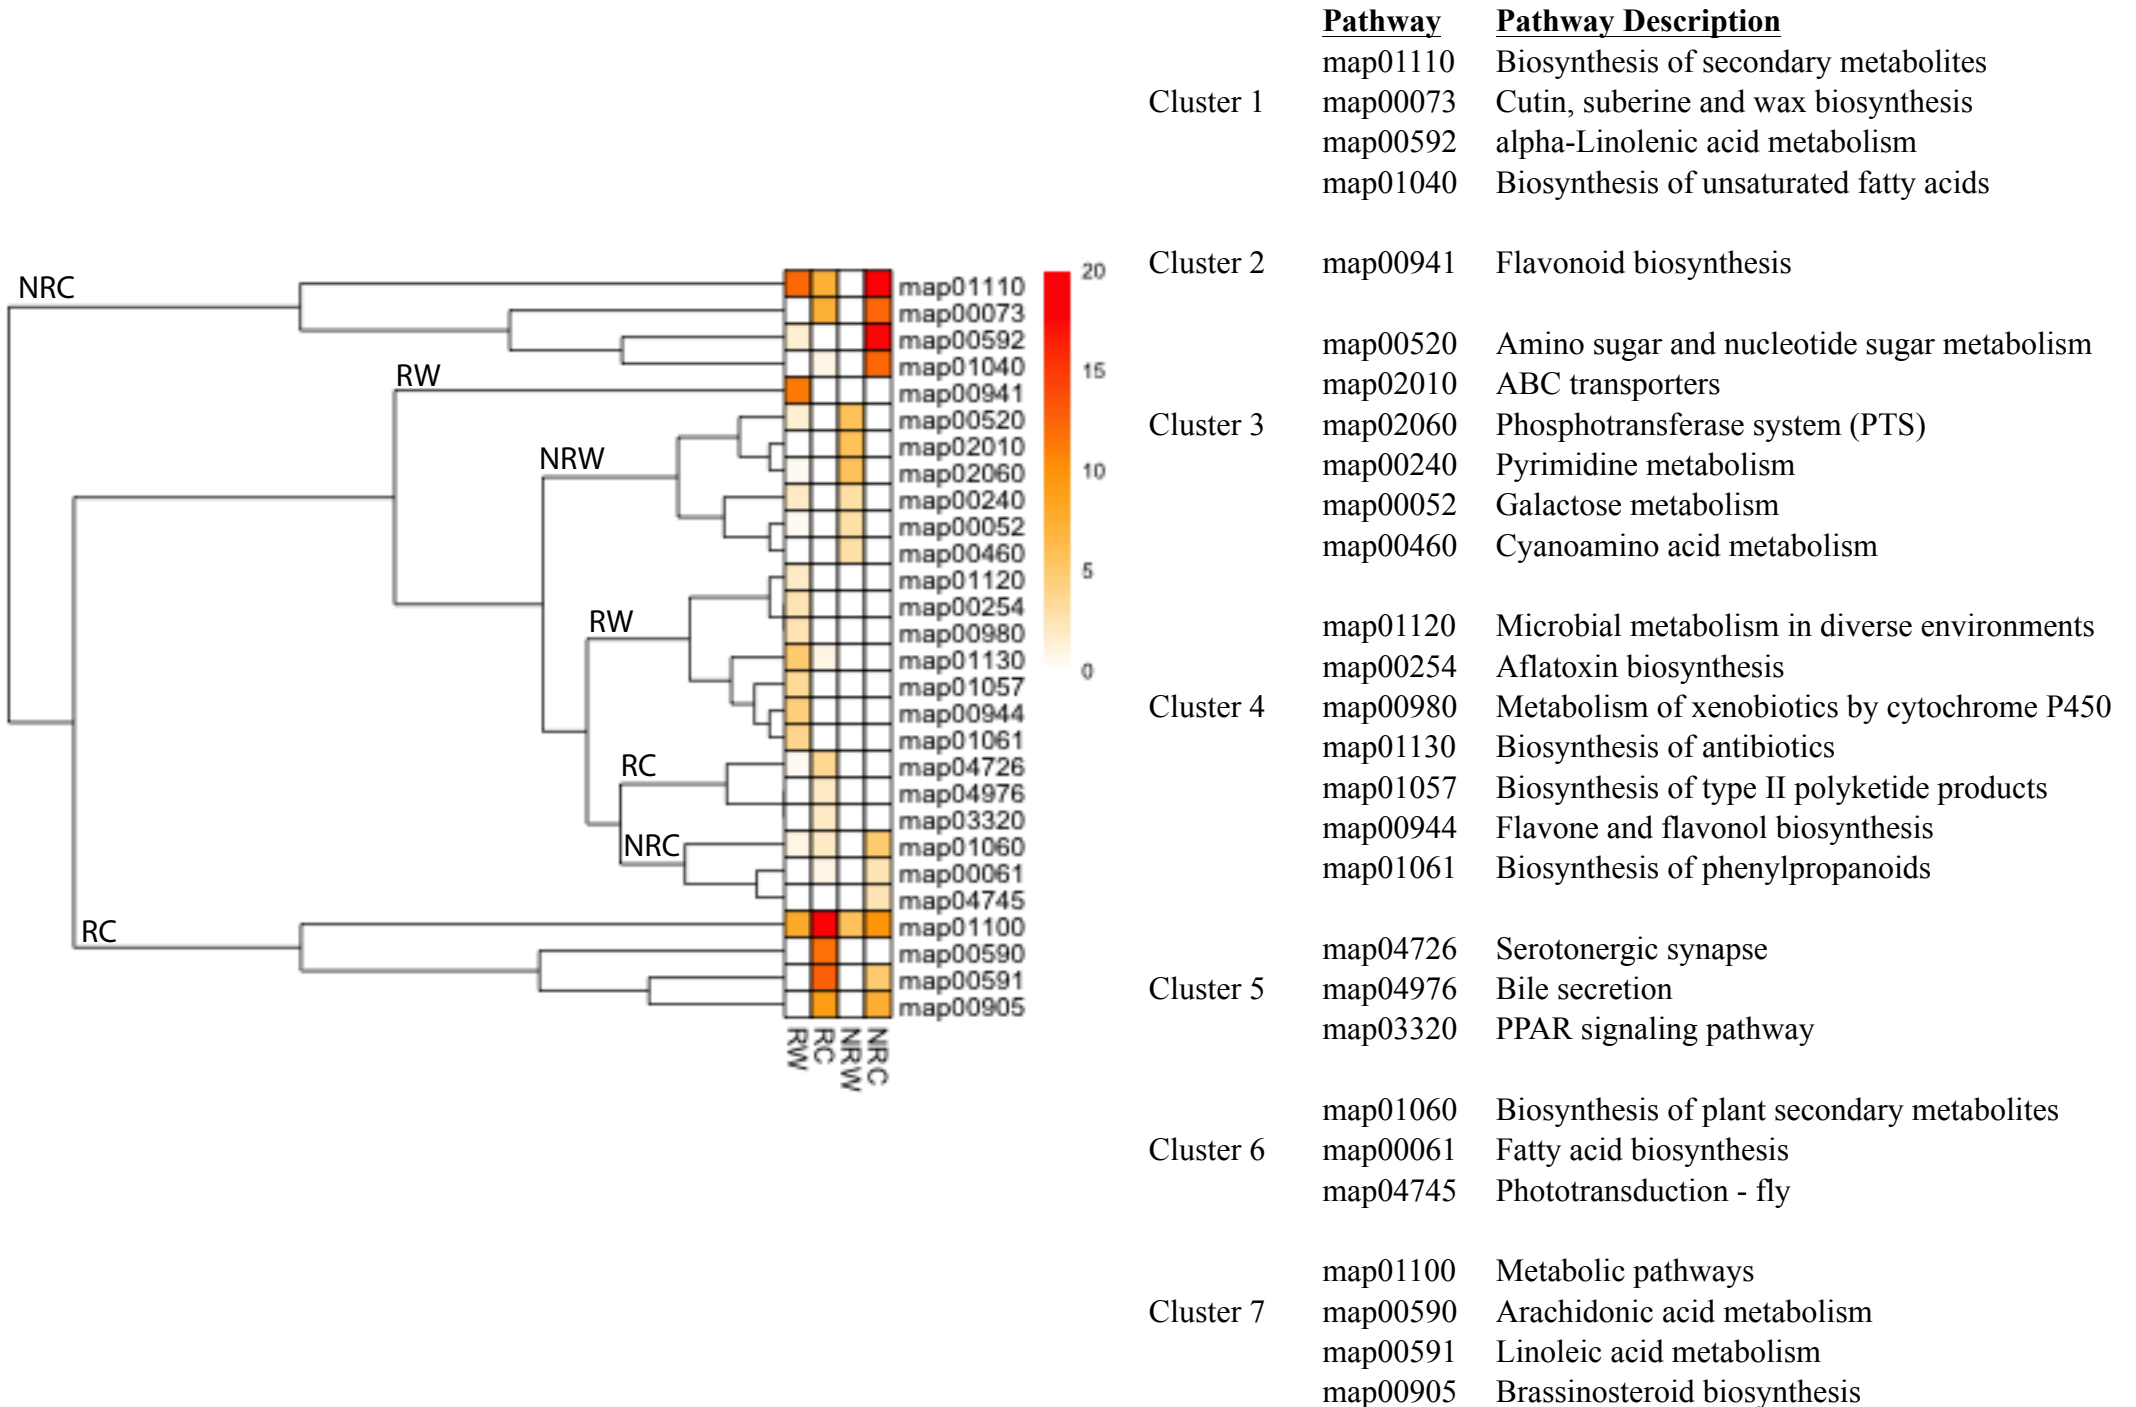

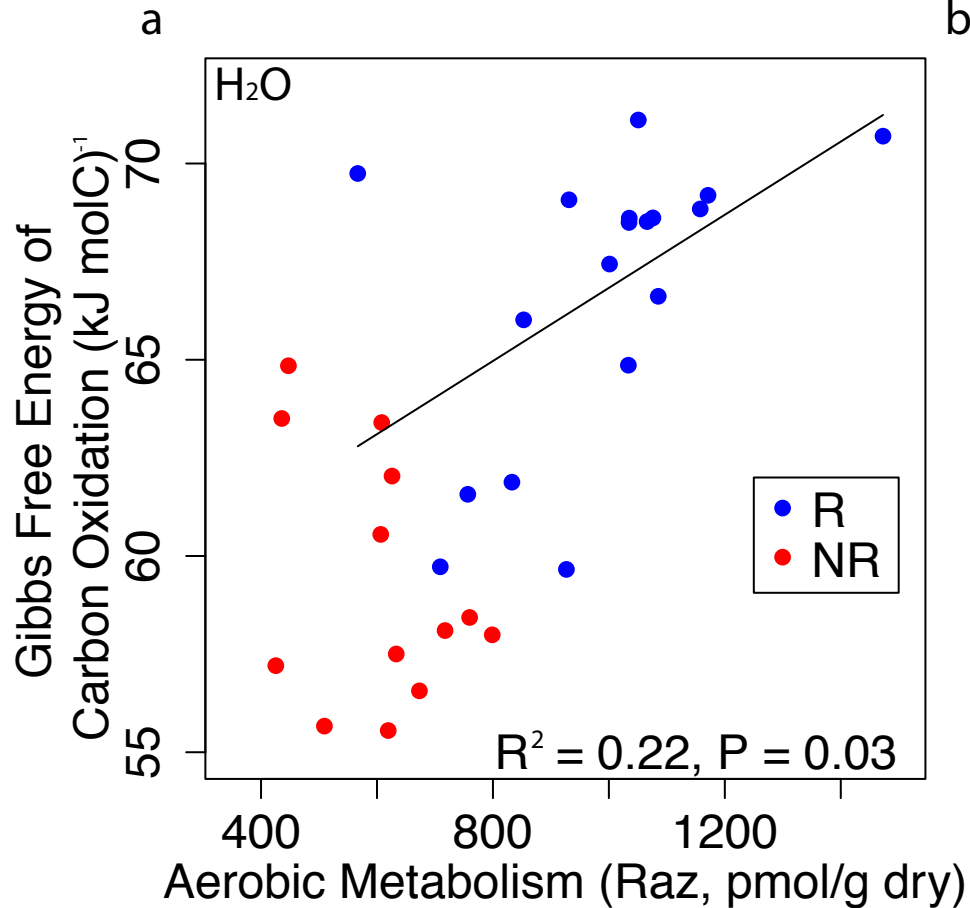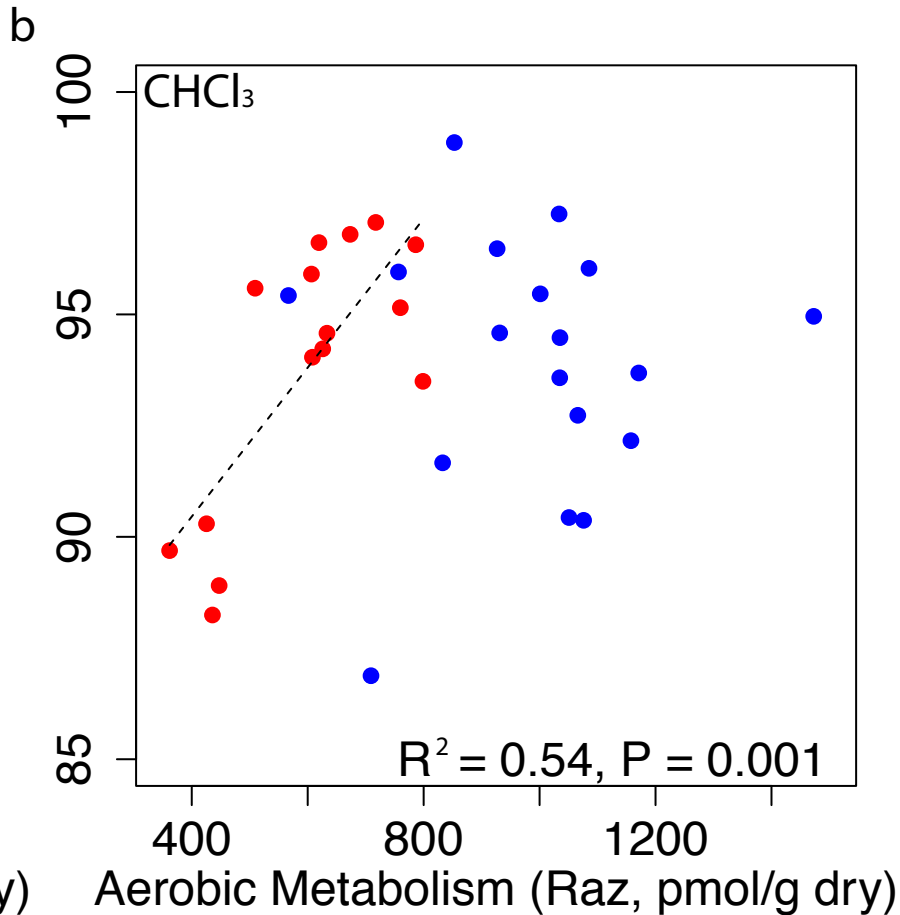

a

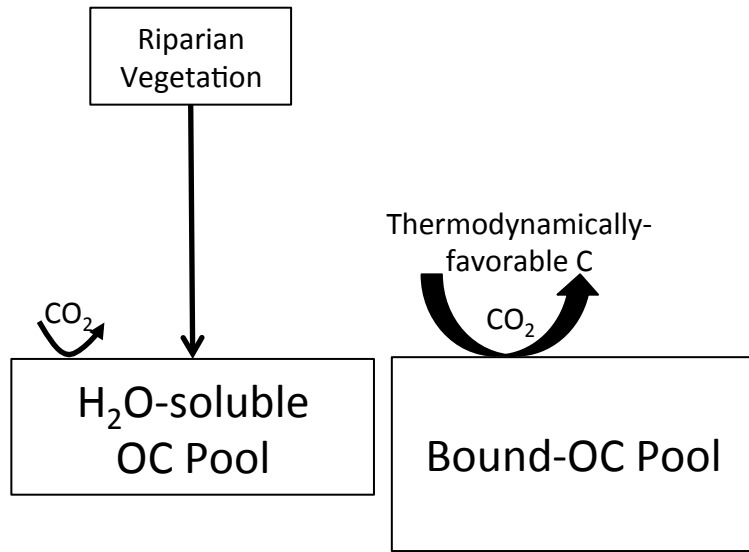

b

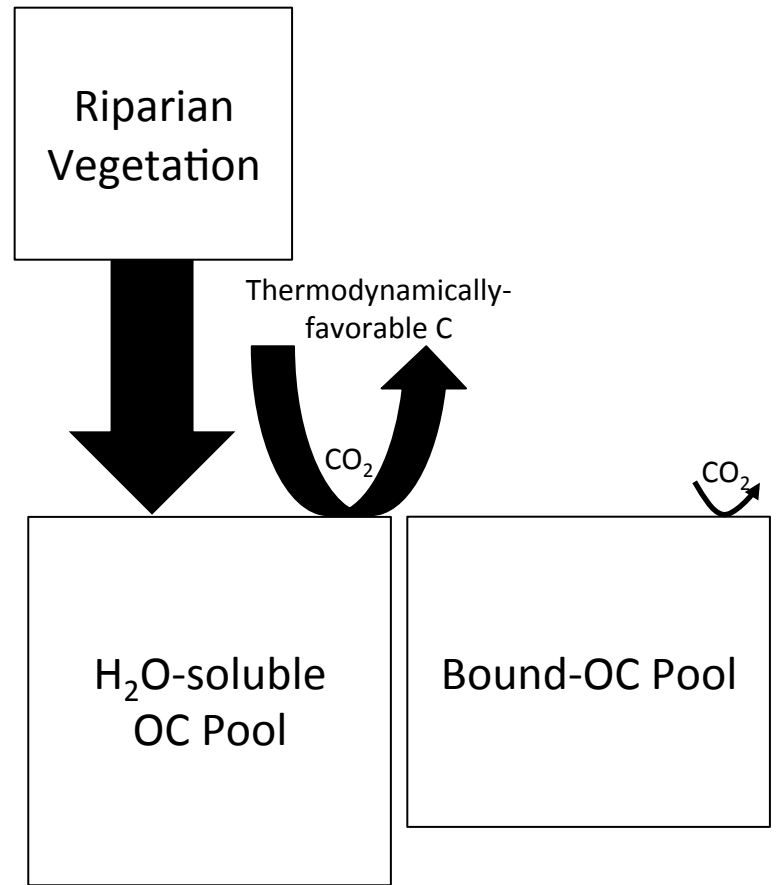

| <b>Abbreviation/Acronym</b> | <b>Description</b>                                          |
|-----------------------------|-------------------------------------------------------------|
| R                           | Transect with dense riparian vegetation                     |
| NR                          | Transect with sparse riparian vegetation                    |
| RW                          | Transect R, water extraction                                |
| RC                          | Transect R, chloroform extraction                           |
| NRW                         | Transect NR, water extraction                               |
| NRC                         | Transect NR, chloroform extraction                          |
| H <sub>2</sub> O            | Water                                                       |
| CHCl <sub>3</sub>           | Chloroform                                                  |
| C                           | Carbon                                                      |
| OC                          | Organic carbon                                              |
| FT-ICR-MS                   | Fourier transform ion cyclotron resonance mass spectrometry |
| KEGG                        | Kyoto Encyclopedia of Genes and Genomes                     |
| $\Delta G_{\text{Cox}}$     | Gibbs Free Energy of C oxidation                            |

|                                              | Pearson's r |
|----------------------------------------------|-------------|
| <b>RW</b>                                    |             |
| biotinyl_(-H)_C10H15N2O3S                    | 0.74        |
| uridine_5_diphosphate_(-H2O)_C9H12N2O11P2    | 0.67        |
| cytosine_(-H)_C4H4N3O                        | 0.65        |
| uridine_5_monophosphate_(-H2O)_C9H11N2O8P    | 0.65        |
| guanine_(-H)_C5H4N5O                         | 0.61        |
| guanosine_(-H2O)_C10H11N5O4                  | 0.59        |
| adenine_(-H)_C5H4N5                          | 0.59        |
| glutathione_(-H2O)_C10H15N3O5S               | 0.57        |
| uracil_(-H)_C4H3N2O2                         | 0.56        |
| glucose_C6H12O6                              | 0.53        |
| C6H10O6                                      | 0.53        |
| Aspartic_Acid_C4H5NO3                        | 0.52        |
| Glucuronic Acid (-H2O)                       | 0.52        |
| Lysine_C6H12N2O                              | 0.51        |
| D-Ribose (-H2O) (ribosylation)               | 0.50        |
| secondary amine                              | 0.50        |
| Alanine_C3H5NO                               | 0.50        |
| C6H10O5                                      | 0.49        |
| monosaccharide (-H2O)                        | 0.49        |
| Threonine_C4H7NO2                            | 0.49        |
| Glutamic_Acid_C5H7NO3                        | 0.48        |
| pentose_C5H8O4                               | 0.47        |
| acetotacetate_(-H2O)_C4H4O2                  | 0.47        |
| Glutamine_C5H8N2O2                           | 0.47        |
| pyridoxal_phosphate_(-H2O)_C8H8NO5P          | 0.47        |
| <b>RC</b>                                    |             |
| isoprene_addition_(-H)_C5H7                  | 0.61        |
| phosphate                                    | 0.56        |
| primary amine                                | 0.55        |
| Glucuronic Acid (-H2O)                       | 0.53        |
| glyoxylate_(-H2O)_C2O2                       | 0.53        |
| malonyl_group_(-H2O)_C3H2O3                  | 0.52        |
| D-Ribose (-H2O) (ribosylation)               | 0.49        |
| pyrophosphate                                | 0.49        |
| acetotacetate_(-H2O)_C4H4O2                  | 0.49        |
| hydrogenation_dehydrogenation_H2             | 0.47        |
| <b>NRW</b>                                   |             |
| NONE                                         | NA          |
| <b>NRC</b>                                   |             |
| Adenosine_5_monophosphate_(-H2O)_C10H12N5O6P | 0.92        |
| adenylate_(-H2O)_C10H12N5O6P                 | 0.92        |
| pyridoxal_phosphate_(-H2O)_C8H8NO5P          | 0.73        |
| acetylation_(-H2O)_C2H2O                     | 0.70        |
| ketol group (-H2O)                           | 0.70        |
| Isoleucine_C6H11NO                           | 0.69        |
| Leucine_C6H11NO                              | 0.69        |
| ethyl addition_(-H2O)_C2H4                   | 0.69        |
| Threonine_C4H7NO2                            | 0.69        |
| Valine_C5H9NO                                | 0.68        |
| Carboxylation_CO2                            | 0.68        |
| Glycine_C2H3NO                               | 0.67        |
| Formic Acid_(-H2O)_CO                        | 0.67        |
| Serine_C3H5NO2                               | 0.67        |
| hydroxylation_(-H)_O                         | 0.67        |
| palmitoylation_(-H2O)_C16H30O                | 0.67        |
| pentose_C5H8O4                               | 0.66        |
| secondary amine                              | 0.66        |
| condensation/dehydration_H2O                 | 0.66        |
| C2H2_C2H2                                    | 0.66        |
| erythrose (-H2O)                             | 0.66        |
| CH4_O                                        | 0.65        |
| methanol (-H2O)                              | 0.65        |
| glyoxylate_(-H2O)_C2O2                       | 0.65        |
| NH_CH2                                       | 0.64        |
| Alanine_C3H5NO                               | 0.63        |
| acetotacetate_(-H2O)_C4H4O2                  | 0.63        |
| Proline_C5H7NO                               | 0.62        |
| hydrogenation_dehydrogenation_H2             | 0.61        |
| Histidine_C6H7N3O                            | 0.60        |
| malonyl_group_(-H2O)_C3H2O3                  | 0.59        |
| Cysteine_C3H5NOS                             | 0.58        |
| glcnac_C8H13N1O5                             | 0.57        |
| Methionine_C5H9NO5                           | 0.57        |
| Arginine_C6H12N4O                            | 0.56        |
| Aspartic_Acid_C4H5NO3                        | 0.56        |
| D-Ribose (-H2O) (ribosylation)               | 0.55        |
